# Supplementary material
Source: ML conference proceedings conference paper supplement (https://www.ecva.net/papers/eccv_2020/papers_ECCV/html/123720409_ECCV_2020_paper.php)
Supplement: Supplementary file 1 [file 123720409-supp.zip]

# A Recurrent Transformer Network for Novel View Action Synthesis (Supplementary)

Kara Marie Schatz<sup>1</sup>, Erik Quintanilla<sup>2</sup>, Shruti Vyas<sup>3</sup>, and Yogesh S Rawat<sup>3</sup>

<sup>1</sup> Xavier University, Cincinnati, Ohio, USA  
`schatzk@xavier.edu`

<sup>2</sup> Illinois Institute of Technology, Chicago, Illinois, USA  
`equintanilla@hawk.iit.edu`

<sup>3</sup> Center for Research in Computer Vision, University of Central Florida, USA  
`{shruti,yogesh}@ucf.edu`

In this document, we provide the architecture details for all the components of the proposed network. It includes video encoder  $f_E$  (Table 1), prior encoder  $g_E$  (Table 2), change in view-point detector  $h$  (Table 4), action transformer  $t_M$  (Table 5), action key-point detector  $k_G$  (Table 6), appearance transformer  $t_A$  (Table 7), and action video generator  $f_G$  (Table 8). We also show some more qualitative results for cross-view video synthesis (Figure 2 and 1), action key-points (Figure 3), and cross-view video synthesis for different actor and scene (Figure 4). Apart from this, the supplementary material also contains a demo video for cross-view video synthesis.

**Table 1.** Network details for the Visual Encoder,  $f_E$ , which is used to encode the input video  $V^i$  into motion features. Note that the input column contains either the tensor used as input to the particular layer or the layer whose output is used as input. Also, note that the Inception module is that from [1]. Since the proposed method involves hierarchical transformation, there are three outputs from this network: VidE-ReLU5a, VidE-ReLU5b, and VidE-ReLU5c. The bottom section of the table indicates three extra convolutional layers, one for each output, used to force a uniform number of channels for all three encodings.

| Name              | Layer            | Input           | Kernel Dims<br>(T × H × W) | Strides<br>(T × H × W) | Output Dims<br>(T × H × W × C) |
|-------------------|------------------|-----------------|----------------------------|------------------------|--------------------------------|
| VidE-Conv1 (skip) | 3D Conv          | $V^i$           | 7 × 7 × 7                  | 2 × 2 × 2              | 8 × 56 × 56 × 64               |
| VidE-MaxPool1     | 3D Max Pool      | VidE-Conv1      | 1 × 3 × 3                  | 1 × 2 × 2              | 8 × 28 × 28 × 64               |
| VidE-Conv2        | 3D Conv          | VidE-MaxPool1   | 1 × 1 × 1                  | 1 × 1 × 1              | 8 × 28 × 28 × 64               |
| VidE-Conv3 (skip) | 3D Conv          | VidE-Conv2      | 3 × 3 × 3                  | 1 × 1 × 1              | 8 × 28 × 28 × 192              |
| VidE-MaxPool2     | 3D Max Pool      | VidE-Conv3      | 1 × 3 × 3                  | 1 × 2 × 2              | 4 × 14 × 14 × 192              |
| VidE-IncModule1   | Inception Module | VidE-MaxPool2   | -                          | -                      | 4 × 14 × 14 × 256              |
| VidE-IncModule2   | Inception Module | VidE-IncModule1 | -                          | -                      | 4 × 14 × 14 × 480              |
| VidE-MaxPool3     | 3D Max Pool      | VidE-IncModule2 | 3 × 3 × 3                  | 1 × 1 × 1              | 4 × 14 × 14 × 480              |
| VidE-IncModule3   | Inception Module | VidE-MaxPool3   | -                          | -                      | 4 × 14 × 14 × 592              |
| VidE-IncModule4   | Inception Module | VidE-IncModule3 | -                          | -                      | 4 × 14 × 14 × 512              |
| VidE-IncModule5   | Inception Module | VidE-IncModule4 | -                          | -                      | 4 × 14 × 14 × 512              |
| VidE-IncModule6   | Inception Module | VidE-IncModule5 | -                          | -                      | 4 × 14 × 14 × 528              |
| VidE-IncModule7   | Inception Module | VidE-IncModule6 | -                          | -                      | 4 × 14 × 14 × 832              |
| VidE-IncModule8   | Inception Module | VidE-IncModule7 | -                          | -                      | 4 × 14 × 14 × 832              |
| VidE-IncModule9   | Inception Module | VidE-IncModule8 | -                          | -                      | 4 × 14 × 14 × 1024             |
| VidE-Conv4        | 3D Conv          | VidE-IncModule9 | 3 × 3 × 3                  | 1 × 1 × 1              | 4 × 14 × 14 × 256              |
| VidE-Conv5a       | 3D Conv          | VidE-Conv1      | 3 × 3 × 3                  | 1 × 1 × 1              | 8 × 14 × 14 × 128              |
| VidE-ReLU5a       | ReLU             | VidE-Conv5a     | -                          | -                      | 8 × 14 × 14 × 128              |
| VidE-Conv5b       | 3D Conv          | VidE-Conv3      | 3 × 3 × 3                  | 1 × 1 × 1              | 8 × 28 × 28 × 128              |
| VidE-ReLU5b       | ReLU             | VidE-Conv5b     | -                          | -                      | 8 × 28 × 28 × 128              |
| VidE-Conv5c       | 3D Conv          | VidE-Conv4      | 3 × 3 × 3                  | 1 × 1 × 1              | 4 × 56 × 56 × 128              |
| VidE-ReLU5c       | ReLU             | VidE-Conv5c     | -                          | -                      | 4 × 56 × 56 × 128              |
| Total Parameters: |                  | 19,365,664      |                            |                        |                                |

**Table 2.** Network details for the Visual Encoder,  $g_E$ , which was based upon [2]. The above table contains an enumeration of all layers and operations used to encode the input frame  $P^j$  into an appearance feature map. Note that the input column contains either the tensor used as input to the particular layer or the layer whose output is used as input. Since the proposed method involves hierarchical transformation, there are three outputs from this network: VisE-ReLU4a, VisE-ReLU4b, and VisE-ReLU4c. The bottom section of the table indicates three extra convolutional layers, one for each output, used to force a uniform number of channels for all three encodings.

| Name              | Layer       | Input         | Kernel Dims<br>(T × H × W) | Strides<br>(T × H × W) | Output Dims<br>(T × H × W × C) |
|-------------------|-------------|---------------|----------------------------|------------------------|--------------------------------|
| VisE-Conv1a       | 2D Conv     | $P^j$         | 3 × 3                      | 1 × 1                  | 112 × 112 × 64                 |
| VisE-ReLU1a       | ReLU        | VisE-Conv1a   | -                          | -                      | 112 × 112 × 64                 |
| VisE-Conv1b       | 2D Conv     | VisE-ReLU1a   | 3 × 3                      | 1 × 1                  | 112 × 112 × 64                 |
| VisE-ReLU1b       | ReLU        | VisE-Conv1b   | -                          | -                      | 112 × 112 × 64                 |
| VisE-MaxPool1     | 2D Max Pool | VisE-ReLU1b   | 2 × 2                      | 2 × 2                  | 56 × 56 × 64                   |
| VisE-Conv2a       | 2D Conv     | VisE-MaxPool1 | 3 × 3                      | 1 × 1                  | 56 × 56 × 128                  |
| VisE-ReLU2a       | ReLU        | VisE-Conv2a   | -                          | -                      | 56 × 56 × 128                  |
| VisE-Conv2b       | 2D Conv     | VisE-ReLU2a   | 3 × 3                      | 1 × 1                  | 56 × 56 × 128                  |
| VisE-ReLU2b       | ReLU        | VisE-Conv2b   | -                          | -                      | 56 × 56 × 128                  |
| VisE-MaxPool2     | 2D Max Pool | VisE-ReLU2b   | 2 × 2                      | 2 × 2                  | 28 × 28 × 128                  |
| VisE-Conv3a       | 2D Conv     | VisE-MaxPool2 | 3 × 3                      | 1 × 1                  | 28 × 28 × 256                  |
| VisE-ReLU3a       | ReLU        | VisE-Conv3a   | -                          | -                      | 28 × 28 × 256                  |
| VisE-Conv3b       | 2D Conv     | VisE-ReLU3a   | 3 × 3                      | 1 × 1                  | 28 × 28 × 256                  |
| VisE-ReLU3b       | ReLU        | VisE-Conv3b   | -                          | -                      | 28 × 28 × 256                  |
| VisE-Conv3c       | 2D Conv     | VisE-ReLU3b   | 3 × 3                      | 1 × 1                  | 28 × 28 × 256                  |
| VisE-ReLU3c       | ReLU        | VisE-Conv3c   | -                          | -                      | 28 × 28 × 256                  |
| VisE-MaxPool3     | 2D Max Pool | VisE-ReLU3c   | 2 × 2                      | 2 × 2                  | 14 × 14 × 256                  |
| VisE-Conv4a       | 2D Conv     | VisE-ReLU3b   | 3 × 3                      | 1 × 1                  | 14 × 14 × 128                  |
| VisE-ReLU4a       | ReLU        | VisE-Conv4a   | -                          | -                      | 14 × 14 × 128                  |
| VisE-Conv4b       | 2D Conv     | VisE-ReLU3c   | 3 × 3                      | 1 × 1                  | 28 × 28 × 128                  |
| VisE-ReLU4b       | ReLU        | VisE-Conv4b   | -                          | -                      | 28 × 28 × 128                  |
| VisE-Conv4c       | 2D Conv     | VisE-MaxPool3 | 3 × 3                      | 1 × 1                  | 56 × 56 × 128                  |
| VisE-ReLU4c       | ReLU        | VisE-Conv4c   | -                          | -                      | 56 × 56 × 128                  |
| Total Parameters: |             | 1,735,488     |                            |                        |                                |

**Table 3.** Network details for the Viewpoint Expander, which repeats the angular change in viewpoint  $\theta_{ij}$  for every spatio-temporal location in the motion features extracted from  $f_E$  and then performs convolutions. This allows  $\theta_{ij}$  to be concatenated with the outputs from  $f_E$  so that both can serve as input to the action transformation network  $t_M$ .

| Name                  | Layer   | Input         | Kernel Dims<br>(T × H × W) | Strides<br>(T × H × W) | Output Dims<br>(T × H × W × C)   |
|-----------------------|---------|---------------|----------------------------|------------------------|----------------------------------|
| E-Expand              | -       | $\theta_{ij}$ | -                          | -                      | $4 \times 14 \times 14 \times 1$ |
| E-Conv1               | 3D Conv | E-Expand      | $3 \times 3 \times 3$      | $1 \times 1 \times 1$  | $4 \times 14 \times 14 \times 4$ |
| E-Conv2               | 3D Conv | E-Conv1       | $3 \times 3 \times 3$      | $1 \times 1 \times 1$  | $4 \times 14 \times 14 \times 1$ |
| Total Parameters: 221 |         |               |                            |                        |                                  |

**Table 4.** Network details for the Viewpoint Change Predictor,  $h$ , which uses the visual encoding of the novel viewpoint and the action embedding of the source viewpoint to predict the angular change in viewpoint  $\hat{\theta}_{ij}$ .

| Name                      | Layer       | Input                         | Kernel Dims<br>(T × H × W) | Strides<br>(T × H × W) | Output Dims<br>(T × H × W × C) |
|---------------------------|-------------|-------------------------------|----------------------------|------------------------|--------------------------------|
| VCP-AvgPool1              | 3D Avg Pool | VidE-ReLU5a                   | $4 \times 1 \times 1$      | $4 \times 1 \times 1$  | $14 \times 14 \times 128$      |
| VCP-Conv1                 | 2D Conv     | VisE-ReLU4a<br>+ VCP-AvgPool1 | $3 \times 3$               | $1 \times 1$           | $14 \times 14 \times 128$      |
| VCP-ReLU1                 | ReLU        | VCP-Conv1                     | -                          | -                      | $14 \times 14 \times 128$      |
| VCP-AvgPool2              | 2D Avg Pool | VCP-ReLU1                     | $2 \times 2$               | $2 \times 2$           | $7 \times 7 \times 128$        |
| VCP-Conv2                 | 2D Conv     | VCP-AvgPool2                  | $3 \times 3$               | $1 \times 1$           | $7 \times 7 \times 32$         |
| VCP-ReLU2                 | ReLU        | VCP-Conv2                     | -                          | -                      | $7 \times 7 \times 32$         |
| VCP-AvgPool3              | 2D Avg Pool | VCP-ReLU2                     | $2 \times 2$               | $2 \times 2$           | $3 \times 3 \times 32$         |
| VCP-Reshape               | Reshape     | VCP-AvgPool3                  | -                          | -                      | 288                            |
| VCP-FC                    | Linear      | VCP-Reshape                   | 288                        | -                      | 1                              |
| Total Parameters: 627,137 |             |                               |                            |                        |                                |

**Table 5.** Network details for the Action Transformer,  $t_M$ , which is used to transform the motion features from the Video Encoder  $f_E$  according to the angular viewpoint change  $\hat{\theta}_{ij}$  or  $\theta_{ij}$  for training. Note that each layer has three inputs and three outputs due to the inclusion of hierarchical transformation. All three outputs from  $f_E$  are transformed in this manner and later used to transform the appearance at three different levels.

| Name              | Layer   | Input                   | Kernel Dims<br>(T × H × W) | Strides<br>(T × H × W) | Output Dims<br>(T × H × W × C) |
|-------------------|---------|-------------------------|----------------------------|------------------------|--------------------------------|
| ActT-Conv1        | 3D Conv | VCP-FC                  | 3 × 3 × 3                  | 1 × 1 × 1              | 4 × 14 × 14 × 257              |
|                   |         | + VidE-ReLU5a<br>VCP-FC |                            |                        | 8 × 28 × 28 × 257              |
|                   |         | + VidE-ReLU5b<br>VCP-FC |                            |                        | 8 × 56 × 56 × 257              |
|                   |         | + VidE-ReLU5c           |                            |                        | 4 × 14 × 14 × 128              |
| ActT-Conv2        | 3D Conv | ActT-Conv1(1)           | 3 × 3 × 3                  | 1 × 1 × 1              | 8 × 28 × 28 × 128              |
|                   |         | ActT-Conv1(2)           |                            |                        | 8 × 56 × 56 × 128              |
|                   |         | ActT-Conv1(3)           |                            |                        | 4 × 14 × 14 × 128              |
| ActT-Conv3        | 3D Conv | ActT-Conv2(1)           | 3 × 3 × 3                  | 1 × 1 × 1              | 8 × 28 × 28 × 128              |
|                   |         | ActT-Conv2(2)           |                            |                        | 8 × 56 × 56 × 128              |
|                   |         | ActT-Conv2(3)           |                            |                        | 4 × 14 × 14 × 128              |
| Total Parameters: |         | 5,329,948               |                            |                        |                                |

**Table 6.** Network details for the action Key-point Detector,  $k_G$ , which extracts 32 action key-points as Gaussian heatmaps from the transformed action embeddings. Note that hierarchical key-point detection is performed as one of the three embeddings of transformed action features is concatenated as input where appropriate. The key-point centers are determined by the first eleven layers. Then, the final layer, Gaussian, turns those centers into Gaussian heatmaps.

| Name                        | Layer       | Input                         | Kernel Dims<br>( $T \times H \times W$ ) | Strides<br>( $T \times H \times W$ ) | Output Dims<br>( $T \times H \times W \times C$ ) |
|-----------------------------|-------------|-------------------------------|------------------------------------------|--------------------------------------|---------------------------------------------------|
| KPD-Conv1                   | 3D Conv     | ActT-Conv3(1)                 | $3 \times 3 \times 3$                    | $1 \times 1 \times 1$                | $4 \times 14 \times 14 \times 128$                |
| KPD-ReLU1                   | ReLU        | KPD-Conv1                     | -                                        | -                                    | $4 \times 14 \times 14 \times 128$                |
| KPD-Inter1                  | Interpolate | KPD-ReLU1                     | -                                        | -                                    | $8 \times 28 \times 28 \times 128$                |
| KPD-Conv2                   | 3D Conv     | KPD-Inter1 +<br>ActT-Conv3(2) | $3 \times 3 \times 3$                    | $1 \times 1 \times 1$                | $8 \times 28 \times 28 \times 128$                |
| KPD-ReLU2                   | ReLU        | KPD-Conv2                     | -                                        | -                                    | $8 \times 28 \times 28 \times 128$                |
| KPD-Inter2                  | Interpolate | KPD-ReLU2                     | -                                        | -                                    | $8 \times 56 \times 56 \times 128$                |
| KPD-Conv3                   | 3D Conv     | KPD-Inter2 +<br>ActT-Conv3(3) | $3 \times 3 \times 3$                    | $1 \times 1 \times 1$                | $8 \times 56 \times 56 \times 128$                |
| KPD-ReLU3                   | ReLU        | KPD-Conv3                     | -                                        | -                                    | $8 \times 56 \times 56 \times 128$                |
| KPD-Inter3                  | Interpolate | KPD-ReLU3                     | -                                        | -                                    | $16 \times 56 \times 56 \times 128$               |
| KPD-Conv4                   | 3D Conv     | KPD-Inter3                    | $3 \times 3 \times 3$                    | $1 \times 1 \times 1$                | $16 \times 56 \times 56 \times 32$                |
| KPD-Sig                     | Sigmoid     | KPD-Conv4                     | -                                        | -                                    | $16 \times 56 \times 56 \times 32$                |
| KPD-Gaussian                | Gaussian    | KPD-Sig                       | -                                        | -                                    | $16 \times 56 \times 56 \times 32$                |
| Total Parameters: 2,322,848 |             |                               |                                          |                                      |                                                   |

**Table 7.** Network details for the Appearance Transformer,  $t_A$ , which is used to transform the appearance embeddings from the Visual Encoder  $g_E$  according to the transformed action features and the predicted action key-points. Note that  $t_A$  is a recurrent network and only one of the recurrent cells is detailed above. This cell would be repeated  $T$  times, where  $T$  is the size of the temporal dimension of the transformed action features. Then, the  $T$  cell outputs are concatenated in the temporal dimension to produce a transformed appearance of the same size as the transformed action features. Also, note that hierarchical transformation is used, so the recurrent network is used three times, once for each of the appearance embeddings.

| Name                        | Layer   | Input                                                        | Kernel Dims<br>( $T \times H \times W$ ) | Strides<br>( $T \times H \times W$ ) | Output Dims<br>( $T \times H \times W \times C$ ) |
|-----------------------------|---------|--------------------------------------------------------------|------------------------------------------|--------------------------------------|---------------------------------------------------|
| AppT-Conv1                  | 2D Conv | ActT-Conv3(1)<br>+ KPD-Gaussian                              | $7 \times 7$                             | $1 \times 1$                         | $14 \times 14 \times 256$                         |
| AppT-Split                  | Split   | + VisE-ReLU4a<br>AppT-Conv1                                  | -                                        | -                                    | $14 \times 14 \times 128$                         |
| AppT-Sig1                   | Sigmoid | AppT-Split(1)                                                | -                                        | -                                    | $14 \times 14 \times 128$                         |
| AppT-Sig2                   | Sigmoid | AppT-Split(2)                                                | -                                        | -                                    | $14 \times 14 \times 128$                         |
| AppT-Conv2                  | 2D Conv | ActT-Conv3(1)<br>+ KPD-Gaussian<br>+ AppT-Sig1 * VisE-ReLU4a | $7 \times 7$                             | $1 \times 1$                         | $14 \times 14 \times 128$                         |
| AppT-Tanh                   | Tanh    | AppT-Conv2                                                   | -                                        | -                                    | $14 \times 14 \times 128$                         |
| AppT-Final                  | Concat  | (1 - AppT-Sig2) * VisE-ReLU4a<br>+ AppT-Sig2 * AppT-Tanh     | -                                        | -                                    | $14 \times 14 \times 128$                         |
| Total Parameters: 5,419,008 |         |                                                              |                                          |                                      |                                                   |

**Table 8.** Network details for the Action Generator,  $f_G$ , which generates the final output video  $\hat{V}^j$  based upon the three sets of transformed appearance features and the predicted action key-points. Note that hierarchical generation is used, so the larger appearance features are concatenated as input where appropriate. The final output has the same dimensions as the input video  $V^i$ .

| Name              | Layer          | Input         | Kernel Dims<br>(T × H × W) | Strides<br>(T × H × W) | Output Dims<br>(T × H × W × C) |
|-------------------|----------------|---------------|----------------------------|------------------------|--------------------------------|
| AG-Conv1a         | 3D Conv        | AppT-Final(1) |                            |                        |                                |
|                   | + KPD-Gaussian | 3 × 3 × 3     | 1 × 1 × 1                  | 4 × 14 × 14 × 128      |                                |
| AG-ReLU1a         | ReLU           | AG-Conv1a     | -                          | -                      | 4 × 14 × 14 × 128              |
| AG-Conv1b         | 3D Conv        | AG-ReLU1a     | 3 × 3 × 3                  | 1 × 1 × 1              | 4 × 14 × 14 × 128              |
| AG-ReLU1b         | ReLU           | AG-Conv1b     | -                          | -                      | 4 × 14 × 14 × 128              |
| AG-Inter1         | Interpolate    | AG-ReLU1b     | -                          | -                      | 8 × 28 × 28 × 128              |
| AG-Conv2a         | 3D Conv        | AppT-Final(2) |                            |                        |                                |
|                   | + KPD-Gaussian | 3 × 3 × 3     | 1 × 1 × 1                  | 8 × 28 × 28 × 128      |                                |
|                   | + AG-Inter1    | AG-Conv2a     | -                          | -                      | 8 × 28 × 28 × 128              |
| AG-ReLU2a         | ReLU           | AG-Conv2a     | -                          | -                      | 8 × 28 × 28 × 128              |
| AG-Conv2b         | 3D Conv        | AG-ReLU2a     | 3 × 3 × 3                  | 1 × 1 × 1              | 8 × 28 × 28 × 64               |
| AG-ReLU2b         | ReLU           | AG-Conv2b     | -                          | -                      | 8 × 28 × 28 × 64               |
| AG-Inter2         | Interpolate    | AG-ReLU2b     | -                          | -                      | 8 × 56 × 56 × 64               |
| AG-Conv3a         | 3D Conv        | AppT-Final(3) |                            |                        |                                |
|                   | + KPD-Gaussian | 3 × 3 × 3     | 1 × 1 × 1                  | 8 × 56 × 56 × 128      |                                |
|                   | + AG-Inter2    | AG-Conv3a     | -                          | -                      | 8 × 56 × 56 × 128              |
| AG-ReLU3a         | ReLU           | AG-Conv3a     | -                          | -                      | 8 × 56 × 56 × 128              |
| AG-Conv3b         | 3D Conv        | AG-ReLU3a     | 3 × 3 × 3                  | 1 × 1 × 1              | 8 × 56 × 56 × 32               |
| AG-ReLU3b         | ReLU           | AG-Conv3b     | -                          | -                      | 8 × 56 × 56 × 32               |
| AG-Inter3         | Interpolate    | AG-ReLU3b     | -                          | -                      | 16 × 112 × 112 × 32            |
| AG-Conv4a         | 3D Conv        | AG-Inter3     | 3 × 3 × 3                  | 1 × 1 × 1              | 16 × 112 × 112 × 8             |
| AG-ReLU4a         | ReLU           | AG-Conv4a     | -                          | -                      | 16 × 112 × 112 × 8             |
| AG-Conv4b         | 3D Conv        | AG-ReLU4a     | 1 × 1 × 1                  | 1 × 1 × 1              | 16 × 112 × 112 × 3             |
| AG-Sig            | Sigmoid        | AG-Conv4b     | -                          | -                      | 16 × 112 × 112 × 3             |
| Total Parameters: | 3,104,131      |               |                            |                        |                                |

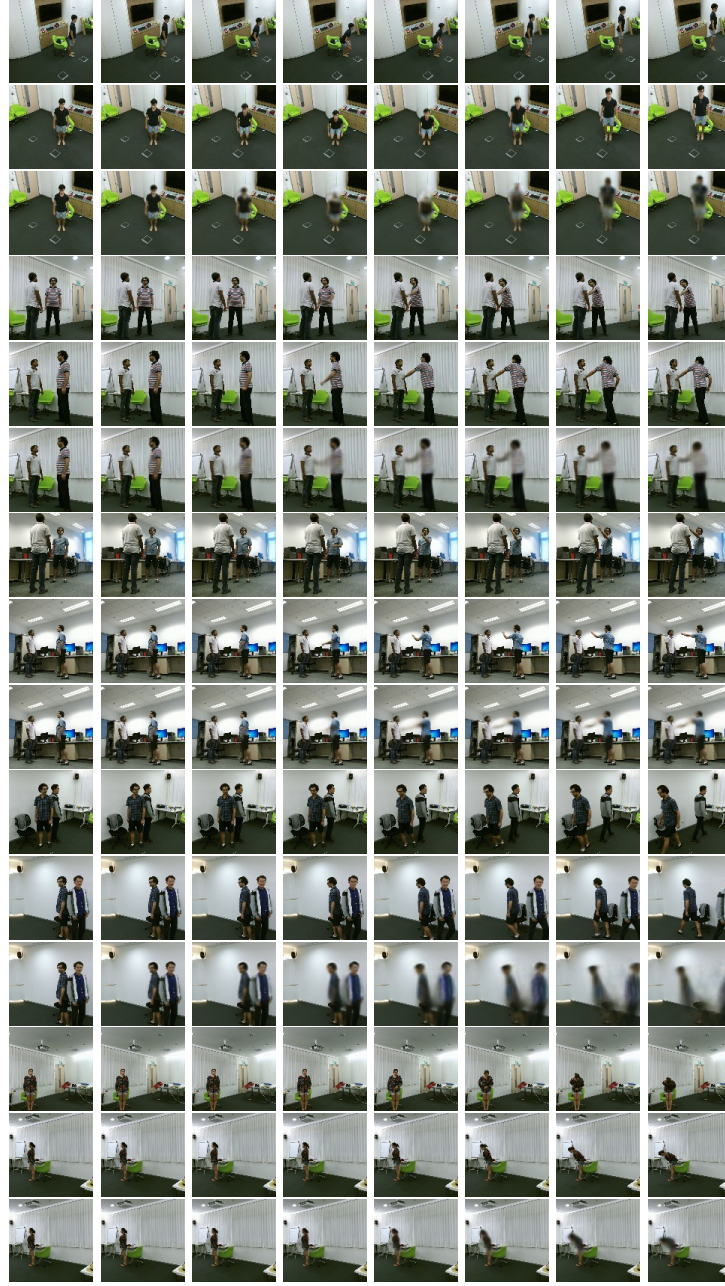

**Fig.1.** Video frames for cross-view synthesis. Source video frames (row 1,4,7,10), ground truth target video frames (row 2,5,8,11), and generated video frames from target view (row 3,6,9,12)

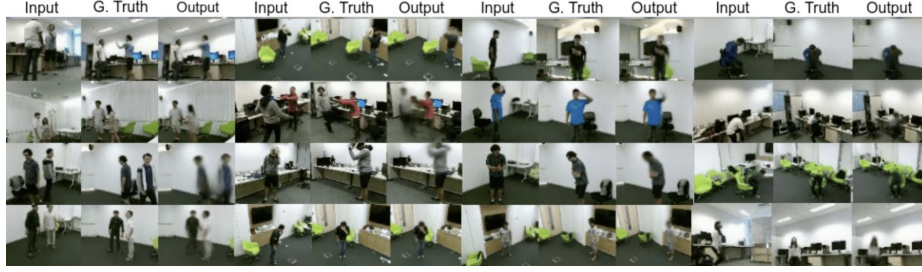

**Fig. 2.** Sample generated video frames for multiple example cases along with corresponding input view and target view frames from the demo video

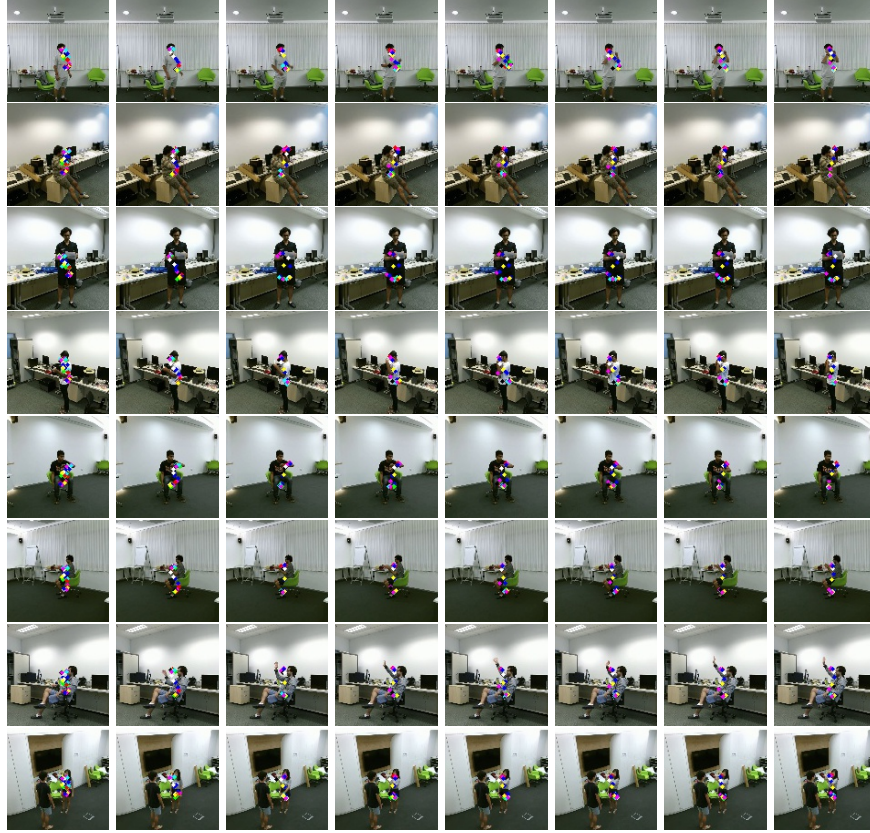

**Fig. 3.** Overlay of the center of the detected action key-points on the video frames from target view-point.



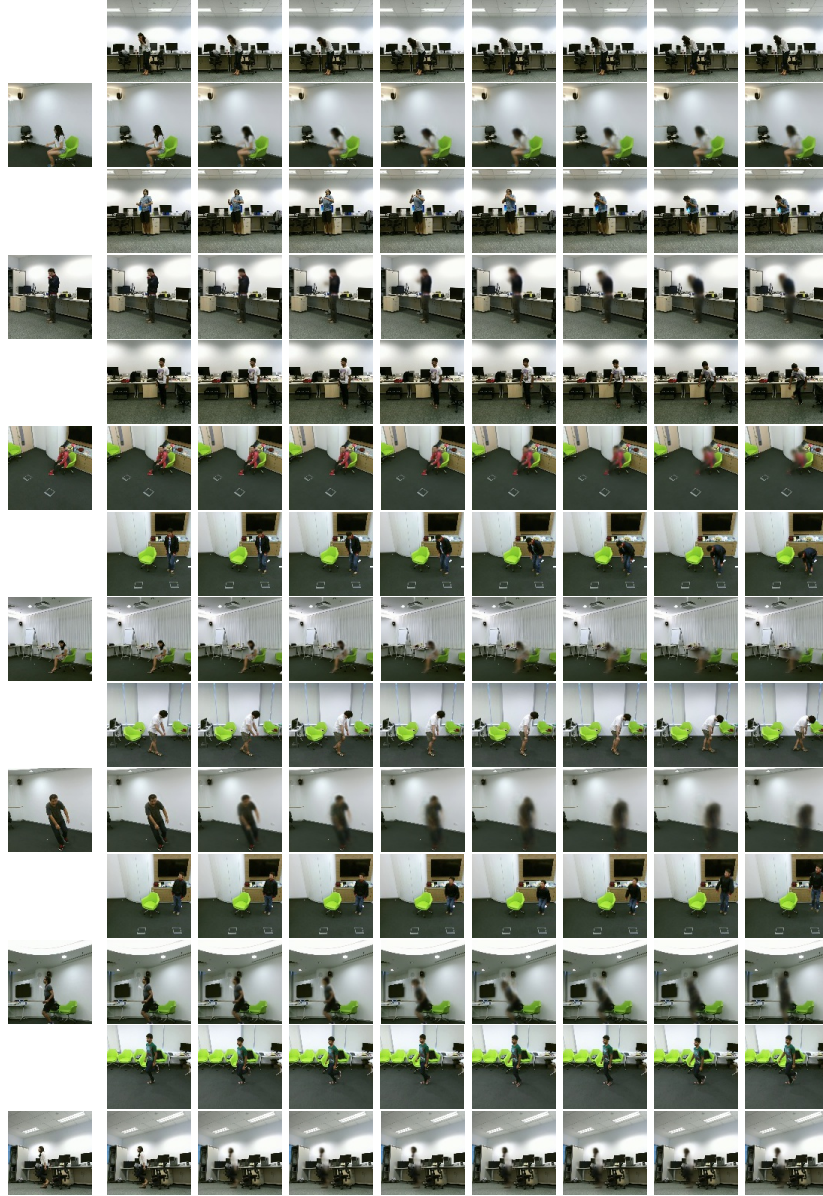

**Fig. 4.** Novel view with novel actor: qualitative results for cross-view video synthesis where the actor and the scene is different from the source action video. Source action video (row 1, 3, 5, 7, 9), and synthesized action video from target view-point (row 2, 4, 6, 8, 10)



## References

1. Joao Carreira and Andrew Zisserman. Quo vadis, action recognition? a new model and the kinetics dataset. In *CVPR*, 2017. 2
2. Karen Simonyan and Andrew Zisserman. Very deep convolutional networks for large-scale image recognition. *arXiv preprint arXiv:1409.1556*, 2014. 2
